# Supplementary material for: Dynamic control of ERG20 expression combined with minimized endogenous downstream metabolism contributes to the improvement of geraniol production in Saccharomyces cerevisiae
Source: PubMed Central journal article supplement (PMC5282783; doi:10.1186/s12934-017-0641-9), 2017-01-31
Supplement: 12934_2017_641_MOESM1_ESM.pdf [file 12934_2017_641_MOESM1_ESM.pdf]

## Supplementary information

**Dynamic control of *ERG20* expression combined with minimized endogenous downstream metabolism contributes to the improvement of geraniol production in *Saccharomyces cerevisiae***

Jianzhi Zhao<sup>1</sup>, Chen Li<sup>1</sup>, Yan Zhang<sup>1</sup>, Yu Shen<sup>1</sup>, Jin Hou<sup>1\*</sup>, Xiaoming Bao<sup>1,2\*</sup>

<sup>1</sup> State Key Laboratory of Microbial Technology, School of Life Science, Shandong University, Jinan 250100, China

<sup>2</sup> Shandong Provincial Key Laboratory of Microbial Engineering, School of Bioengineering, QiLu University of Technology, Jinan, 250353, China

\*Corresponding authors: Xiaoming Bao and Jin Hou. Tel/Fax: +86 531 8836 5826;

E-mail: [bxm@sdu.edu.cn](mailto:bxm@sdu.edu.cn) and [houjin@sdu.edu.cn](mailto:houjin@sdu.edu.cn).

Table S1. Primers used in this study.

| Primer name                    | Sequences (5'→3')                                                                     | Amplified genes                     |
|--------------------------------|---------------------------------------------------------------------------------------|-------------------------------------|
| <i>P<sub>ERG20</sub></i> -UP-F | GACAATCATTACCACAAGATGAACAC                                                            | <i>ERG20</i> upstream arm           |
| <i>P<sub>ERG20</sub></i> -UP-R | GCGTACGAAGCTTCACCGCTTAGAATACCTC<br>ACACTG                                             |                                     |
| <i>P<sub>ERG20</sub></i> -DN-F | ATGGCTTCAGAAAAAGAAATTAGG                                                              | <i>ERG20</i> downstream arm         |
| <i>P<sub>ERG20</sub></i> -DN-R | GTCGACTTTGTCTTCAGGTGC                                                                 |                                     |
| <i>kanMX</i> -F                | AGGTATTCTAAGCGGTGAAGCTTCGTACGCT<br>GCAGG                                              | <i>KanMX</i> expression<br>cassette |
| <i>kanMX</i> -R                | CGCATAGGCCACTAGTGGATCTGAT                                                             |                                     |
| <i>P<sub>BTS1</sub></i> -F     | GTGATATCAGATCCACTAGTGGCCTATGCGA<br>CGATGTATAGCCGCCATCTC                               | <i>BTS1</i> promoter                |
| <i>P<sub>BTS1</sub></i> -R     | CTCTCTCCTAATTTCTTTTTCTGAAGCCATTG<br>ATTTCCAGACTCGTAAAC                                |                                     |
| <i>P<sub>CTR3</sub></i> -F     | GTGATATCAGATCCACTAGTGGCCTATGCGA<br>AGATAATAGACAGTCATAGCATGA                           | <i>CTR3</i> promoter                |
| <i>P<sub>CTR3</sub></i> -R     | CTCTCTCCTAATTTCTTTTTCTGAAGCCATAG<br>CAGTGCTGCTACTGCCTC                                |                                     |
| <i>P<sub>HXT1</sub></i> -F     | GTGATATCAGATCCACTAGTGGCCTATGCGT<br>GCAGGTCTCATCTGGAATATAATTCC                         | <i>HXT1</i> promoter                |
| <i>P<sub>HXT1</sub></i> -R     | CTCTCTCCTAATTTCTTTTTCTGAAGCCATGA<br>TTTTACGTATATCAACTAGTTGAC                          |                                     |
| <i>OYE2</i> -UP-F              | AAAACGGAGTAGAATCGGTAAG                                                                | <i>OYE2</i> upstream arm            |
| <i>OYE2</i> -UP-R              | CGTCTATATTTAGCTTAATATGATG                                                             |                                     |
| <i>OYE2</i> -DN-F              | TAGTGTTAACCGTACTTTGTAG                                                                | <i>OYE2</i> downstream arm          |
| <i>OYE2</i> -DN-R              | ATAGGATGATGAATGACAGCAT                                                                |                                     |
| <i>ATF1</i> -UP-F              | ACTTTTTGGACATTGAGCTAAG                                                                | <i>ATF1</i> upstream arm            |
| <i>ATF1</i> -UP-R              | GAGAGCTGATAAATTGATGGT                                                                 |                                     |
| <i>ATF1</i> -DN-F              | ATCTCACATGATGCTTGACTG                                                                 | <i>ATF1</i> downstream arm          |
| <i>ATF1</i> -DN-R              | CGACGATTCTGACCCTTTCTA                                                                 |                                     |
| <i>OYE2-kanMX</i> -F           | TAAATCATCATATTAAGCTAAATATAGACGTG<br>AAGCTTCGTACGCTGCAGG                               | <i>OYE2</i> deletion fragment       |
| <i>OYE2-kanMX</i> -R           | AAATGGTGCTACAAAGTACGGTTAACTACTAC<br>GCATAGGCCACTAGTGGATCT                             |                                     |
| <i>ATF1-kanMX</i> -F           | ATCACAATACCATCAATTTATCAGCTCTCTG<br>AAGCTTCGTACGCTGCAGG                                | <i>ATF1</i> deletion fragment       |
| <i>ATF1-kanMX</i> -R           | GAATAATATCAGTCAAGCATCATGTGAGATC<br>GCATAGGCCACTAGTGGATCT                              |                                     |
| <i>LEU2</i> -F                 | CAAAGGGGACGTTCTTCACCTCCTTGGAAT<br>GTGTTCCACTATCCTGTACATGAACTGTGGG<br>AATACTCAGGTATCGT | <i>LEU2</i> expression<br>cassette  |
| <i>LEU2</i> -R                 | CAAATATATTCATGGCCTCTTAGTTTGGCAA<br>CCCAAGACTCGGCATACCTCGACTACGTCGT<br>TAAGGCCG        |                                     |

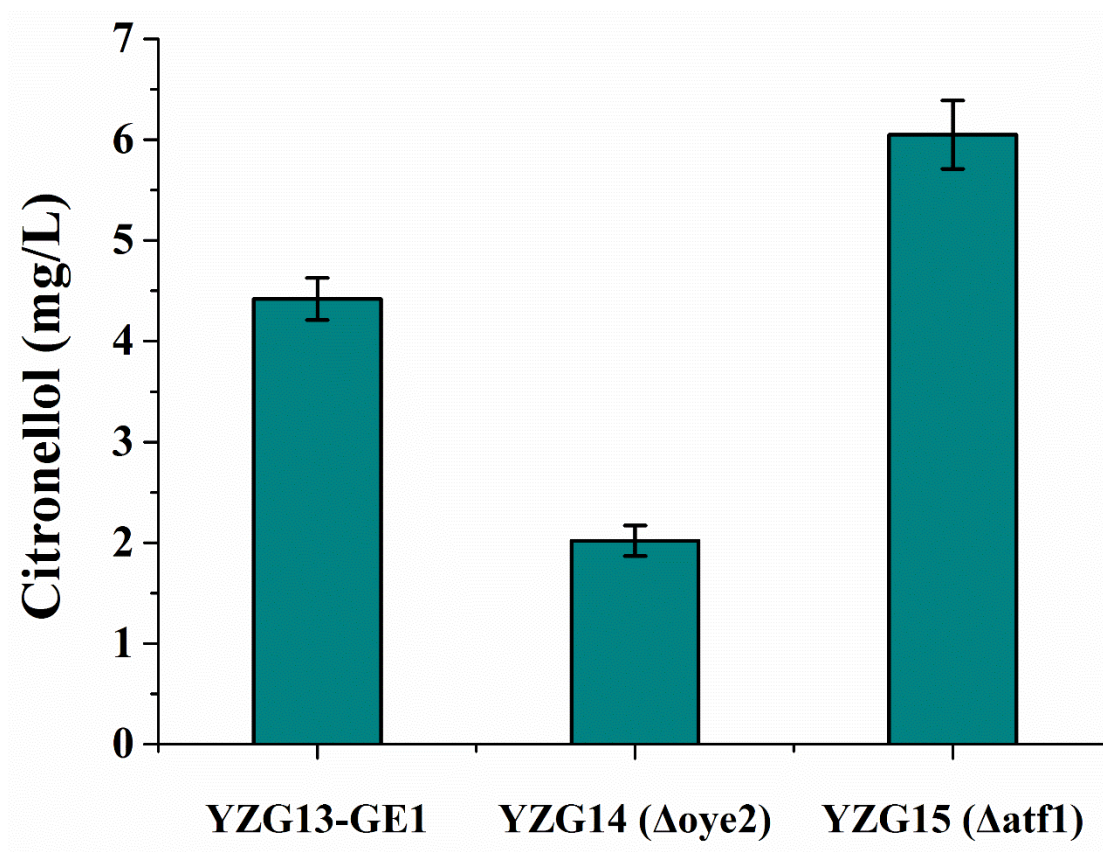

Figure S1. The conversion of geraniol to citronellol in control strain and deletion strains.

The data shown are representative of duplicate experiments, and the error bars represent the standard deviation.

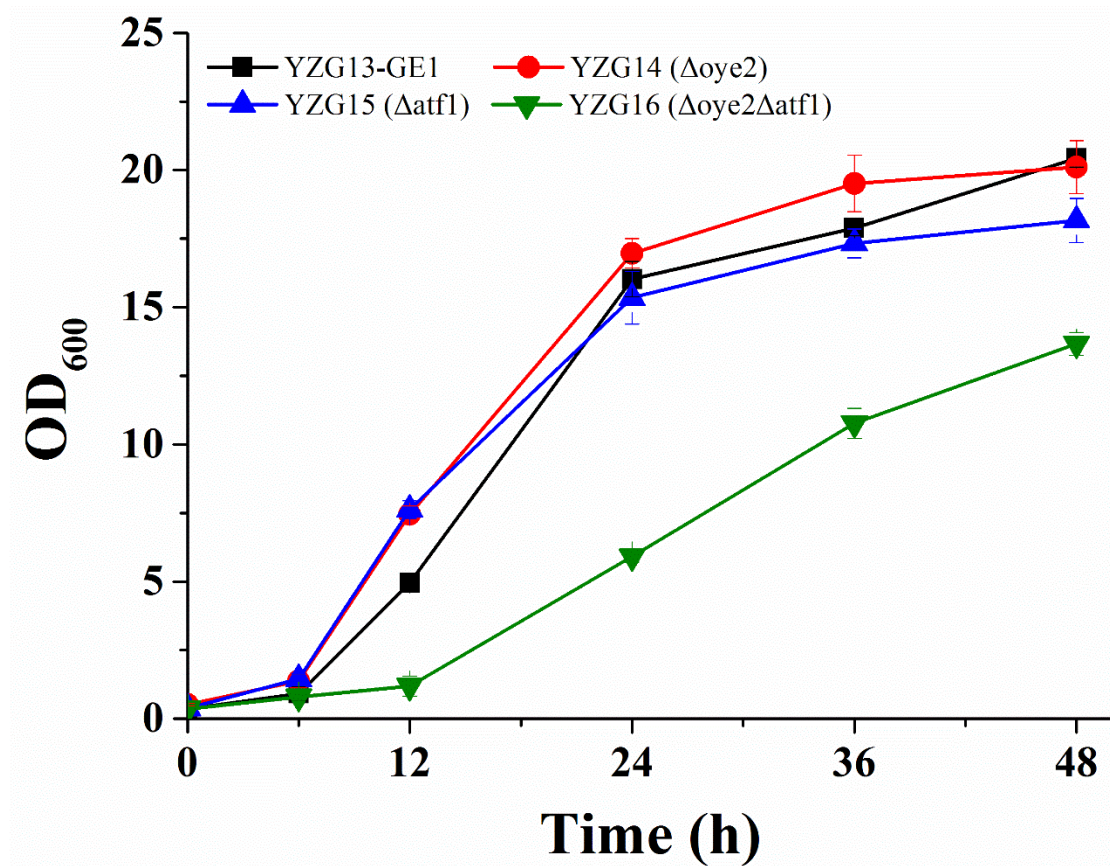

Figure S2. The effect of *OYE2* or/and *ATF1* deletion on cell growth in batch fermentation. All strains harbored pZGV6-GE1 and pZMVA4 plasmids for geraniol production. The data shown are representative of duplicate experiments, and the error bars represent the standard deviation.

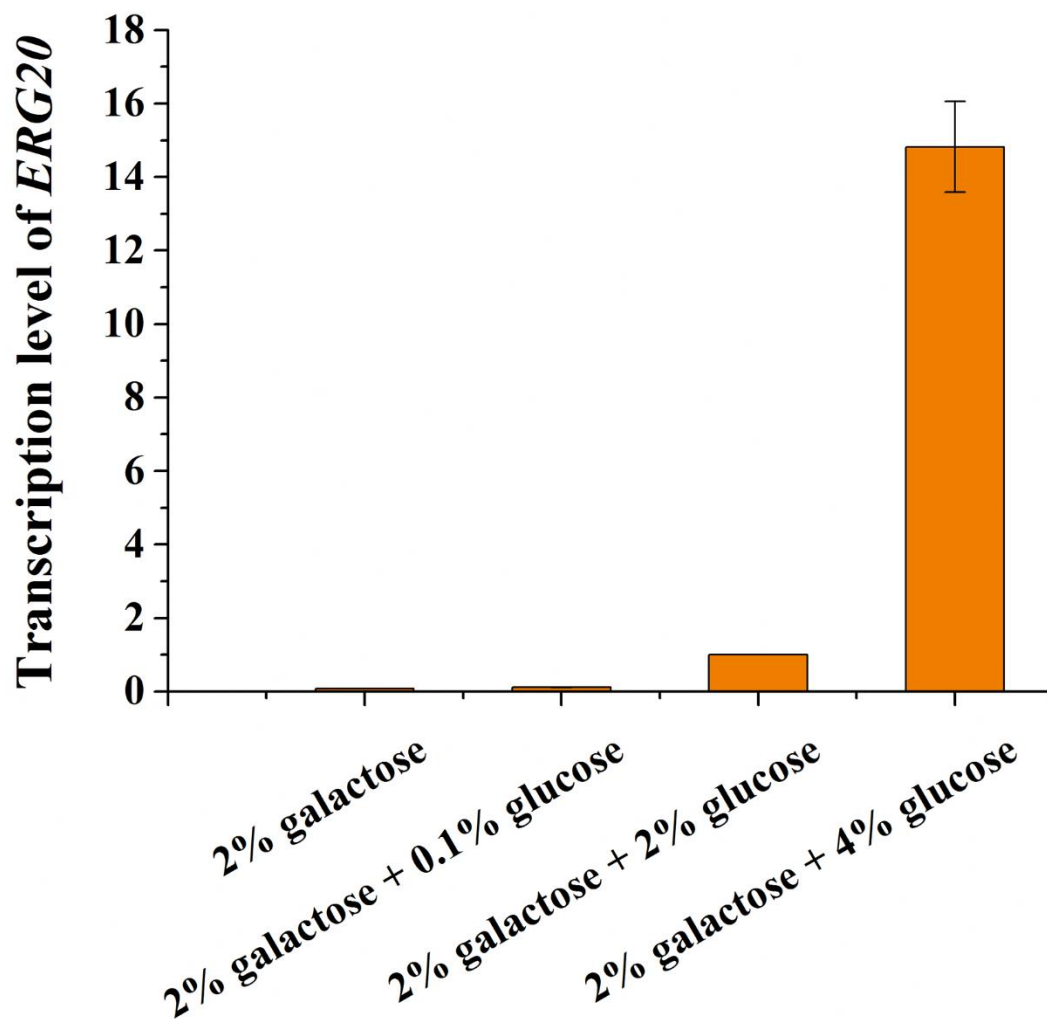

Figure S3. Transcription level of *ERG20* controlled by different promoters in SD-URA-HIS medium with different concentrations glucose. The cells were collected when  $OD_{600}$  reached 0.6 to extract mRNA for *ERG20* mRNA and transcription determination. The data shown are representative of triplicate experiments, and the error bars represent the standard deviation.

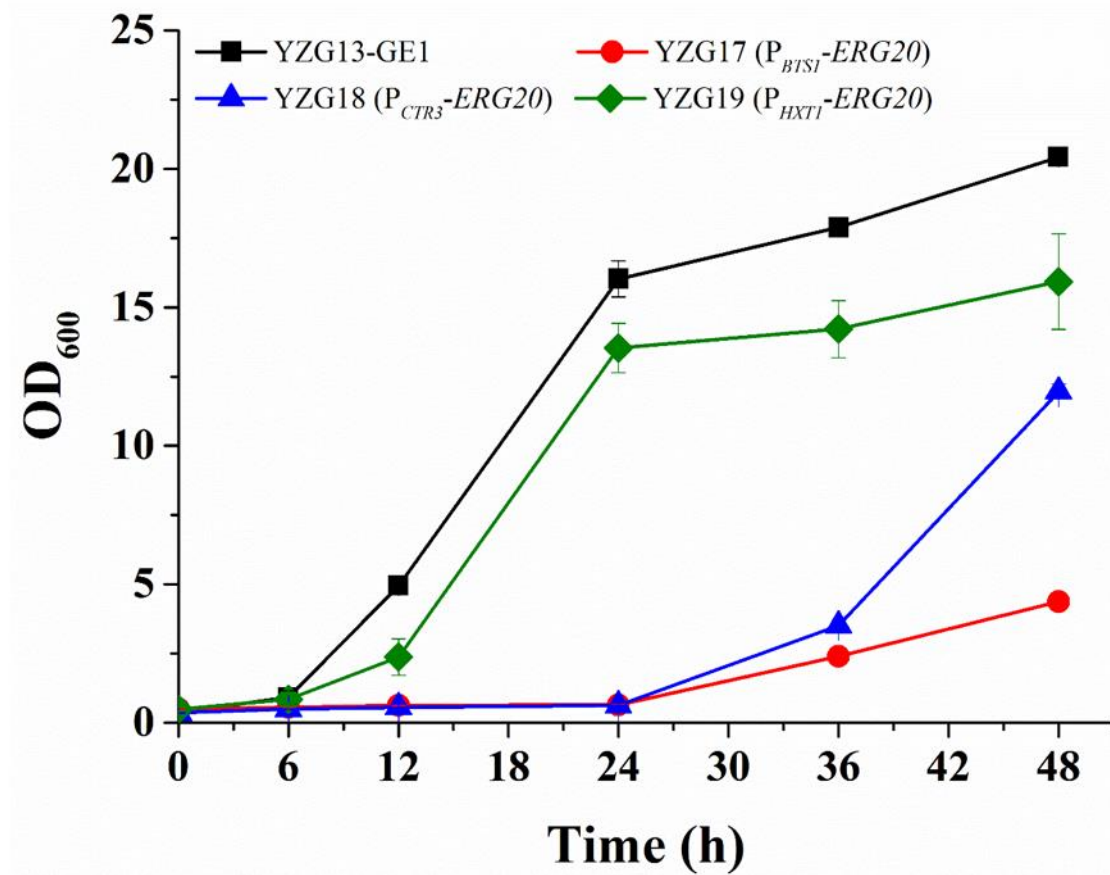

Figure S4. The effect of *ERG20* expression controlled by different promoters on cell growth in batch fermentation. All strains harbored pZGV6-GE1 and pZMVA4 plasmids for geraniol production. The data shown are representative of duplicate experiments, and the error bars represent the standard deviation.
